# Supplementary material
Source: MDPI journal article supplement (https://www.mdpi.com/2078-1547/6/1/98)
Supplement: s1 [file s1]

*Supplementary Information*

**Hybrid Life Cycle Assessment of Low, Mid and High-Rise Multi-Family Dwellings**


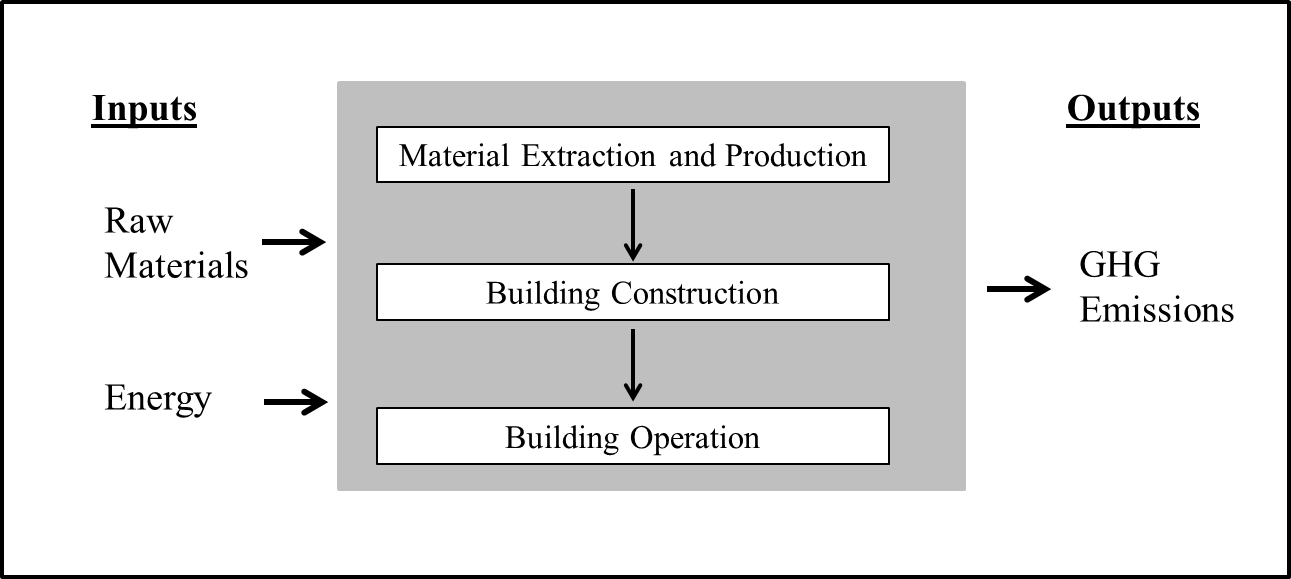


**Figure S1.** System boundary diagram.

**Table S1.** Sample of line items from the bill of materials for the 3-story, Stucco on Concrete Block, Wood Joists, multi-family residence [1].

| **Line #** | **Line Item Description** | **Qty** | **Unit** | **Ext. Mtl. Price** | **Ext. Labor Price** | **Ext. Eqmt. Price** |
| --- | --- | --- | --- | --- | --- | --- |
| 1 | Backfill, trench, 6′′ to 12′′ lifts, dozer backfilling, compaction with vibrating roller | 2.66 | E.C.Y. |  | $1.06 | $6.08 |
| 2 | Excavating, trench or continuous footing, common earth, 3/8 C.Y. excavator, 1′ to 4′ deep, excludes sheeting or dewatering | 8.02 | B.C.Y. |  | $26.16 | $17.82 |
| 3 | Excavating, trench or continuous footing, common earth, trim sides and bottom for concrete pours, excludes sheeting or dewatering | 144.77 | S.F. |  | $63.70 | $4.34 |
| 4 | C.I.P. concrete forms, footing, continuous wall, plywood, 4 use, includes erecting, bracing, stripping and cleaning | 108.44 | SFCA | $186.52 | $146.40 |  |
| 5 | C.I.P. concrete forms, footing, keyway, tapered wood, 2′′ × 6′′, 4 use, includes erecting, bracing, stripping and cleaning | 54.22 | L.F. | $10.30 | $20.06 |  |
| 6 | Reinforcing Steel, in place, footings, #4 to #7, A615, grade 60, incl labor for accessories, excl material for accessories | 223.94 | Lb. | $89.58 | $49.27 |  |
| 7 | Reinforcing steel, in place, dowels, deformed,  2′ long, #4, A615, grade 60 | 108.44 | Ea. | $60.73 | $100.85 |  |
| 8 | Structural concrete, ready mix, normal weight, 3000 psi, includes local aggregate, sand, Portland cement and water, delivered, excludes all additives and treatments | 5.37 | C.Y. | $510.82 |  |  |
| 9 | Structural concrete, placing, continuous footing, shallow, direct chute, includes strike off & consolidation, excludes material | 5.37 | C.Y. |  | $43.80 | $2.68 |
| **Additional Material Line Items Not Shown** | | | | | | |
|  | **Total** |  |  | **$1,309,459** | **$540,090** | **$8823** |

Qty: Quantity; Ext. Mtl.: Extended material; Ext. Labor: Extended labor; Ext. Eqmt.: Extended equipment.

**Table S2.** Values for PPR, PPI, energy and GWP intensities for the study economic sectors.

| **NAICS Economic Sector** | **Description** | **PPI a (2002/2010)** | **PPR b** | **Energy Intensity MJ/$ c** | **GWP Intensity (tCO2eq/M$) c** |
| --- | --- | --- | --- | --- | --- |
| 333415 | Air conditioning, refrigeration, and warm air heating equipment manufacturing | 0.81 | 0.56 | 8.53 | 581 |
| 33299C | Other fabricated metal manufacturing | 0.78 | 0.61 | 12.5 | 839 |
| 33131B | Aluminum product manufacturing from purchased aluminum | 0.92 | 0.89 | 24.3 | 1560 |
| 324122 | Asphalt shingle and coating materials manufacturing | 0.52 | 0.80 | 15.7 | 1160 |
| 32712A | Brick, Tile and Other Structural clay product Mfg. | 0.83 | 0.45 | 31.4 | 2010 |
| 314110 | Carpet and rug mills | 0.78 | 0.58 | 18.4 | 1170 |
| 327310 | Cement manufacturing | 0.78 | 0.78 | 74.4 | 11,600 |
| 335920 | Communication and energy wire and cable manufacturing | 0.62 | 0.62 | 12.6 | 762 |
| 327330 | Concrete pipe, brick, and block manufacturing | 0.81 | 0.57 | 17.1 | 1920 |
| 335311 | Electric power and specialty transformer manufacturing | 0.60 | 0.80 | 11.5 | 813 |
| 335120 | Lighting fixture manufacturing | 0.88 | 0.68 | 8.53 | 558 |
| 3274A0 | Lime and gypsum product manufacturing | 0.91 | 0.76 | 44.7 | 5320 |
| 333920 | Material handling equipment manufacturing | 0.81 | 0.94 | 10.4 | 747 |
| 321910 | Wood windows and doors and millwork | 0.97 | 0.63 | 10.9 | 595 |
| 327993 | Mineral wool manufacturing | 0.88 | 0.95 | 23.1 | 1380 |
| 335312 | Motor and generator manufacturing | 0.77 | 0.54 | 9.7 | 660 |
| 333319 | Other commercial and service industry machinery manufacturing | 0.90 | 0.72 | 7.9 | 533 |
| 335228 | Other major household appliance manufacturing | 0.68 | 0.71 | 9.93 | 655 |
| 32619A | Other plastics product manufacturing | 0.82 | 0.58 | 14.8 | 904 |
| 325510 | Paint and coating manufacturing | 0.70 | 0.76 | 16.5 | 1070 |
| 332913 | Plumbing fixture fitting and trim manufacturing | 0.78 | 0.47 | 9.25 | 570 |
| 333991 | Power-driven handtool manufacturing | 0.97 | 0.75 | 8.69 | 575 |
| 237320 | Ready mix concrete manufacturing | 0.71 | 0.69 | 23.5 | 2740 |
| 212320 | Sand, gravel, clay, and refractory mining | 0.71 | 0.52 | 21.6 | 1490 |
| 32121B | Engineered wood member and truss manufacturing | 1.04 | 0.65 | 13.6 | 522 |

PPR: Producer/purchaser ratio; PPI: Producer price index; MJ/$: Megajoules per dollar spent; GWP: Global warming potential; tCO2eq/$: Tonne Carbon dioxide equivalent emissions per million dollars spent; a Source: [2];
b Source: [3]; c Source: [4].

**Table S2.** *Cont.*

| **NAICS Economic Sector** | **Description** | **PPI a (2002/2010)** | **PPR b** | **Energy Intensity MJ/$ c** | **GWP Intensity (tCO2eq/M$) c** |
| --- | --- | --- | --- | --- | --- |
| 32121A | Veneer and plywood manufacturing | 0.93 | 0.83 | 16.6 | 777 |
| 337110 | Wood kitchen cabinet and countertop manufacturing | 0.86 | 0.57 | 8.6 | 520 |
| 32222A | Coated and laminated paper, packaging materials, and plastic films | 0.83 | 0.62 | 19 | 896 |
| 321999 | Miscellaneous wood product manufacturing | 0.90 | 0.78 | 11.1 | 629 |
| 332996 | Fabricated pipe and pipe fitting manufacturing | 0.57 | 0.79 | 12.6 | 937 |
| 326122 | Plastics pipe and pipe fitting manufacturing | 0.53 | 0.50 | 23.7 | 1420 |
| 331200 | Iron, steel pipe and tube from purchased steel | 0.49 | 0.54 | 25.2 | 2030 |
| 33211A | All other forging, stamping and sintering | 0.75 | 0.58 | 20.5 | 1490 |
| 334290 | Other communications equipment manufacturing | 0.94 | 0.88 | 5.23 | 342 |
| 332800 | Coating, engraving, heat treating and allied activities | 0.81 | 0.98 | 16.6 | 1140 |
| 32711A | Pottery, ceramics, and plumbing fixture manufacturing | 0.88 | 0.75 | 16.5 | 1080 |
| 334419 | Other electronic component manufacturing | 0.89 | 0.80 | 6.83 | 454 |
| 335313 | Switchgear and switchboard apparatus manufacturing | 0.77 | 0.72 | 6.44 | 423 |
| 333911 | Pump and pumping equipment manufacturing | 0.73 | 0.83 | 8.49 | 563 |
| 327215 | Glass Product Manufacturing Made of Purchased Glass | 0.95 | 0.64 | 16 | 946 |
| 332720 | Turned product & screw, nut & bolt mfg | 0.74 | 0.91 | 9.94 | 707 |

PPR: Producer/purchaser ratio; PPI: Producer price index; MJ/$: Megajoules per dollar; GWP: Global warming potential; tCO2eq/$: Tonne Carbon dioxide equivalent emissions per dollar; a Source: [2]; b Source: [3];
c Source: [4].

**Table S3.** Values used to calculate CED and GWP contributions for the construction life cycle phase of a multi-family residence.

| **Value Type** | **Purchased Electricity (kWh)** | **Natural/Manufacturing Gas (1000 ft3)** | **Gas/Diesel Fuel (Gal)** | | **Total** |
| --- | --- | --- | --- | --- | --- |
| **Off-Highway** | **On-Highway** |
| Dollars Spent ($) a | 4.3E + 0.7 | 1.2E + 0.7 | 1.2E + 0.7 | 4.8E + 0.7 | 1.2E + 0.8 |
| Unit Prices ($) | $.0488/kWh c | $4.0/1000 ft 3d | $1.3/Gal e | $1.3/Gal e | - |
| Site to Source Factor | 3.365 b | - | - | - | - |
| **Energy (GJ)** | 1.1E + 0.7 | 3.2E + 0.6 | 1.3E + 0.6 | 5.0E + 0.6 | **2.0E + 0.7** |
| Fuel Economy (MPG) | - | - | - | 5.8 i | - |
| CO2 (tCO2/unit) | 7.6E – 0.4f | 5.4E – 0.2 h | 1.1E – 0.2 h | 1.1E – 0.2h | - |
| CH4 (tCO2eq/unit) |  | - | 1.5E – 05.g,h | 1.3E – 0.7 g,h | - |
| N2O (tCO2eq/unit) |  | - | 7.7E – 0.5 g,h | 1.4E – 0.5g,h | - |
| **GWP (tCO2eq)** | 6.7E + 0.5 | 1.6E + 0.5 | 9.8E + 0.4 | 3.91E + 0.5 | **1.3E + 0.6** |

CED: Cumulative energy demand; GWP: Global warming potential; kWh: Kilowatt hour; ft3: Cubic feet; GJ: Gigajoules; Gal: Gallon; MPG: Miles per gallon; CO2: Carbon dioxide; CH4: Methane: N2O: Nitrous oxide; tCO2eq: Tonne carbon dioxide equivalent; $: Dollars.
Btu = 1.055E – 6 GJ; a Source: [5]. Excludes miscellaneous fuels and lubricants of $6.5 million; b Source: [6]; c Source: [7]. A conversion factor of 3412 Btu/kWh is used [8]; d Source: [9]. A conversion factor of 1.024E + 06Btu/1000 ft3 is used based on total average heating value for natural gas consumption in U.S. economic sectors [10]; e Source: [11]. A conversion factor of 5.411 MMBtu/barrel is used representing the transportation sector in 2002 [12]. A conversion factor of 42 Gal/barrel is used [13]; f Source: [14]. A CO2eq coefficient of 758gCO2eq/kWh is used; g Factors of 25 and 298 are used as CO2eq for methane (CH4) and nitrious oxide (N2), respectively [15];
h Source: [16]. Weighted national average for stationary combustion is used for natural gas. A conversion factor of 1.024E + 06Btu/1000 ft3 is used based on total average heating value for natural gas consumption in U.S. economic sectors [10]; i Source: [17].

**Table S4.** Inventory of input flows contributed by fuels (El., NG and FO) used for space conditioning (heating and cooling) and all activities during the operation life cycle phase.

| **Multi-Family Rise** | **Total Area (Heated/Cooled) m2 a** | **Primary Annual Energy used for Heating/Cooling (El., NG and FO) (MBtu) a** | **Total Area (All Activities) m2 a** | **Primary Annual Energy used for All Activities (El., NG and FO) (MBtu) a** |
| --- | --- | --- | --- | --- |
| **High-Rise** | 1.21E + 08 | 6.72E + 10 | 1.25E + 08 | 1.58E + 11 |
| **Mid-Rise** | 2.16E + 08 | 1.09E + 11 | 2.21E + 08 | 2.54E + 11 |
| **Low-Rise** | 1.13E + 09 | 5.31E + 11 | 1.16E + 09 | 1.44E + 12 |

High-Rise: Multi-family residence with 8 or more floors; Mid-Rise: Multi-family residence having
4–7 floors; Low-Rise: Multi-family residence having 3 or less floors; m2: Square meter; MBtu: Thousand British thermal units; FO: Fuel oil, El.: Electricity; a Source: [18]. The microdata for low, mid and high-rise residences in the U.S. is used to obtain data on consumption from electricity, natural gas and fuel oil for space heating and cooling only, per unit area, as well as consumption from electricity, natural gas and fuel oil from all activities per unit area. The total area of residence is used. An average U.S. site to source factor of 3.365 for electricity is used [6]. Each household in the microdata is weighted. The weight is multiplied only after the total MBtu and square footage of interest (heating/cooling or all activities) is calculated to avoid multiple weighting errors.

**Table S5.** Values for annual CED and GWP contributed by space conditioning (heating and cooling) and all activities during the operation life cycle phase.

| **Multi-Family Rise** | **Primary Annual Energy used for Heating/Cooling (GJ/m2) a** | **Primary Annual Energy used for all Activities (GJ/m2) a** | **Total Annual GWP (tCO2/m2) b Heating/Cooling)** |
| --- | --- | --- | --- |
| **High-Rise** | 0.59 | 1.34 | 0.034 |
| **Mid-Rise** | 0.53 | 1.21 | 0.032 |
| **Low-Rise** | 0.50 | 1.31 | 0.029 |

CED: Cumulative energy demand; GWP: Global warming potential; GJ/m2: Gigjoules per square meter; tCO2eq/m2: Tonne carbon dioxide equivalent per square meter; High-Rise: Multi-family residence with 8 or more floors; Mid-Rise: Multi-family residence having 4–7 floors; Low-Rise: Multi-family residence having
3 or less floors; a MBtu = 1.055E-3GJ; b Greenhouse gas (CO2eq) coefficient for electricity generation in the U.S. is obtained from [14]. Carbon dioxide coefficients for natural gas and fuel oil (home heating oil) consumption are obtained from Table H.1 in [16]. A weighted average for stationary combustion is used for natural gas. CH4 and N2Ocoefficients are found in Table H.3 for residential stationary combustion [16]. Carbon dioxide equivalent (CO2eq) factors of 25 and 298 are used for contributions from methane (CH4) and (nitrous oxide) N2O, respectively [15].

**Table S6.** Results of the hybrid LCA of multi-family residences by life cycle phase.

| **Stories** | **Type** | **m2** | **ft2** | **CED (GJ/ m2) and GWP (tCO2eq/m2)** | | | | | | | |
| --- | --- | --- | --- | --- | --- | --- | --- | --- | --- | --- | --- |
| **Material** | | **Construction** | | **Operation** | | **Total** | |
| **CED** | **GWP** | **CED** | **GWP** | **CED** | **GWP** | **CED** | **GWP** |
| 3 | WS/W | 2837 | 30,500 | 4.2 | 0.30 | 0.83 | 0.05 | 25 | 1.45 | 30 | 1.8 |
| 3 | SCB/WJ | 2837 | 30,500 | 4.0 | 0.30 | 0.84 | 0.05 | 25 | 1.45 | 29.9 | 1.8 |
| 4 | PCP/RC | 6045 | 65,000 | 5.9 | 0.50 | 1.2 | 0.08 | 26.5 | 1.6 | 33.6 | 2.2 |
| 4 | PCP/S | 6045 | 65,000 | 6.0 | 0.50 | 1.2 | 0.08 | 26.5 | 1.6 | 33.7 | 2.2 |
| 7 | PCP/RC | 5580 | 60,000 | 6.2 | 0.53 | 1.2 | 0.08 | 26.5 | 1.6 | 33.8 | 2.2 |
| 7 | PCP/S | 5580 | 60,000 | 6.3 | 0.53 | 1.2 | 0.08 | 26.5 | 1.6 | 34 | 2.2 |
| 11 | RPC/RC | 7510 | 80,750 | 7.9 | 0.66 | 1.7 | 0.11 | 29.5 | 1.7 | 39 | 2.5 |
| 11 | RPC/S | 7510 | 80,750 | 8.6 | 0.72 | 1.7 | 0.11 | 29.5 | 1.7 | 39.9 | 2.5 |
| 21 | PCP/RC | 20,135 | 216,500 | 7.5 | 0.63 | 1.6 | 0.10 | 29.5 | 1.7 | 38.6 | 2.4 |
| 21 | PCP/S | 20,135 | 216,500 | 8.4 | 0.70 | 1.7 | 0.11 | 29.5 | 1.7 | 39.5 | 2.5 |

WS/W: Wood siding/wood frame; SCB/WJ: Stucco on concrete block/wood joists; PCP/RC: Precast concrete panels/reinforced concrete: PCP/S: Precast concrete panels/steel; RPC/RC: Ribbed precast concrete/reinforced concrete; RPC/S: Ribbed precast concrete/steel; CED: Cumulative energy demand; GJ/m2: Gigajoules per square meter; tCO2eq/m2: Tonne Carbon dioxide equivalent per square meter;
m2: Square meter; ft2: Square feet.

**Table S7.** Results of the ranges of CED for each life cycle phase for the current and previous LCA studies.

| **Study** | **Life Span (years)** | **Materials Extraction and Production (GJ/m2)** | | **Construction (GJ/m2)** | | **Operation (GJ/m2) a** | |
| --- | --- | --- | --- | --- | --- | --- | --- |
| **Low** | **High** | **Low** | **High** | **Low** | **High** | |
| Present study ***** | 50 | 4 | 8.6 | 0.83 | 1.7 | 25 | 29.5 | |
| [19] | 50 | 2.6 | 3 | 0.3 | 0.4 | 23 | 27 | |
| [20] | 50 | 2.6 | 3.4 | 1 | 1.7 | 48 | 82 | |
| [21] ***** | 50 | 3.4 | 7 | 1 | 1.2 | 46 | 68 | |
| [22] ***** | 50 | 4.2 | 5 | 1.1 | 1.4 | 21 | 26 | |
| [23] ***** | 50 | 6.6 (low), 7.3 (high) (values include both life cycle phases) | | | | 21 | 64 | |

LCA: Life cycle assessment; CED: Cumulative energy demand; GJ/m2: Gigajoules per square meter;
a Results for operation life cycle phase will be larger for studies that calculate primary energy, or the total energy consumed as well including the energy required to produce electricity. The studies that are known to include primary energy are indicated with an ‘*****’. Also, the current study and [22] only included heating and cooling energy, therefore, the operation energy will be less. Previous work suggests heating and cooling to be approximately 50% of U.S. residential energy consumption [24].

**References**

1. Reed Construction Data Inc. *RS MeansOn-line*; Reed Construction Data Inc.: Norcross, GA, USA, 2012.
2. U.S. Bureau of Labor Statistics. Producer Price Indexes. Available online: http://www.bls.gov/ppi/ (accessed on 21 June 2012).
3. U.S. Bureau of Economic Analysis. Benchmark Input-Output Data. Available online: http://www.bea.gov/industry/io_benchmark.htm (accessed on 21 June 2012).
4. Carnegie Mellon University Green Design Institute. Economic Input-Output Life Cycle Assessment (EIO-LCA) US 2002 (428) Model [Internet]. Available online: http://www.eiolca.net/ (accessed on 24 July 2012).
5. U.S. Census Bureau. Economic Census, Industry Series Reports, Construction, New Multifamily Housing Construction (Except Operative Builders). Available online: http://www.census.gov/
   prod/ec02/ec0223i236116.pdf (accessed on 17 September 2012).
6. Deru, M.; Torcellini, P. *Source Energy and Emission Factors for Energy Use in Buildings*; Technical Report NREL/TP-550-38617; National Renewable Energy Laboratory: Golden, CO, USA, 2007. Available online: http://www.nrel.gov/docs/fy07osti/38617.pdf (accessed on 1 July 2012).
7. U.S. EIAa, Department of Energy. Electric Power Monthly, Sept. 2012, Average Retail Price of Electricity to Ultimate Customers: Total by End-Use Sector, Table 5.3, Industrial Sector for 2002. Available online: http://www.eia.gov/electricity/monthly/current_year/september2012.pdf (accessed on 10 December 2013).
8. U.S. EIAb, Department of Energy. Monthly Energy Review, Nov. 2013, Appendix A6.
   Available online: http://www.eia.gov/totalenergy/data/monthly/pdf/mer.pdf (accessed on
   10 December 2013).
9. U.S. EIAc, Department of Energy. United States Natural Gas Industrial Price for 2002.
   Available online: http://www.eia.gov/dnav/ng/hist/n3035us3A.htm (accessed on 11 December 2013).
10. U.S. EIAd, Department of Energy. Monthly Energy Review, Nov. 2013, Appendix A4. Available online: http//:www.eia.gov/totalenergy/data/monthly/pdf/mer.pdf (accessed on 10 December 2013).
11. U.S. EIAe, Department of Energy. U.S. No. 2 Diesel Retail Prices, data for 2002. Available online: http://www.eia.gov/dnav/pet/hist/LeafHandler.ashx?n=pet&s=emd_epd2d_pte_nus_dpg&f=a (accessed on 10 December 2013).
12. U.S. EIAf, Department of Energy. Monthly Energy Review, Nov. 2013, Appendix A3. Available online: http://www.eia.gov/totalenergy/data/monthly/pdf/mer.pdf (accessed on 10 December 2013).
13. U.S. EIAg, Department of Energy (2013), Monthly Energy Review, Nov. 2013, Appendix B3. Available online: http://www.eia.gov/totalenergy/data/monthly/pdf/mer.pdf (accessed on
    10 December 2013).
14. Deru, M.; Torcellini, P. *Source Energy and Emission Factors for Energy Use in Buildings*; Technical Report NREL/TP-550-38617; National Renewable Energy Laboratory: Golden, CO, USA, 2007. Available online: http://www.nrel.gov/docs/fy07osti/38617.pdf (accessed on 1 July 2012).
15. Intergovernmental Panel on Climate Change (IPCC). Fourth Assessment Report. Available online: http://www.ipcc.ch/publications_and_data/ar4/wg1/en/ch2s2–10–2.html#table-2-14 (accessed on
    4 June 2012).
16. U.S. EIAi, Department of Energy. Instructions for Form 1605, Appendix H, Fuel Emissions Factors. Available online: http://www.eia.gov/survey/form/eia_1605/instructions.pdf (accessed on 1 July 2013).
17. U.S. EIAj, Department of Energy. Monthly Energy Review, Nov. 2013, Motor Vehicle Mileage, Fuel Consumption, and Fuel Economy, Table 1.8, Heavy duty trucks 2002. Available online: http://www.eia.gov/totalenergy/data/monthly/pdf/sec1_17.pdf (accessed on 10 December 2013).
18. U.S. EIA, Department of Energy. Residential Energy Consumption Survey (RECS), RECS 2009 Survey Data, Microdata. Available online: http://www.eia.gov/consumption/residential/data/2009/
    index.cfm?view=microdata (accessed on 10 December 2013).
19. Adalberth, K. Energy use during the life cycle of single-unit dwellings: Examples. *Build. Environ.* **1997**, *32*, 321–329.
20. Cole, R.J.; Kernan, P.C. Life-cycle energy use in office buildings. *Build. Environ.* **1996**, *31*, 307–317.
21. Junnila, S., Horvath, A.; Guggemos, A.A. Life-cycle assessment of office buildings in Europe and the United States. *J. Infrastruct. Syst.* **2006**, *12*, 10–17.
22. Frijia, S.; Guhathakurta, S.; Williams, E.D. Functional unit, technological dynamics and scaling properties for the life cycle energy of residences. *Environ. Sci. Technol.* **2011**, *46*, 1782–1788.
23. Keoleian, G.A.; Blanchard, S.; Reppe, P. Life-cycle energy, costs, and strategies for improving a single-family house. *J. Ind. Ecol.* **2001**, *4*, 135–156.
24. Perez-Lombard, L.; Ortiz, J.; Pout, C. A review on buildings energy consumption information. *Energy Build.* **2008**, *40*, 394–398.

© 2015 by the authors; licensee MDPI, Basel, Switzerland. This article is an open access article distributed under the terms and conditions of the Creative Commons Attribution license (http://creativecommons.org/licenses/by/4.0/).
